# Supplementary material for: Fasting plasma chenodeoxycholic acid and cholic acid concentrations are inversely correlated with insulin sensitivity in adults
Source: Springer Nature journal article supplement (doi:10.1186/1743-7075-8-48), 2011-01-01

**A**

Center 2

■ diabetic ◇ obese ▲ control

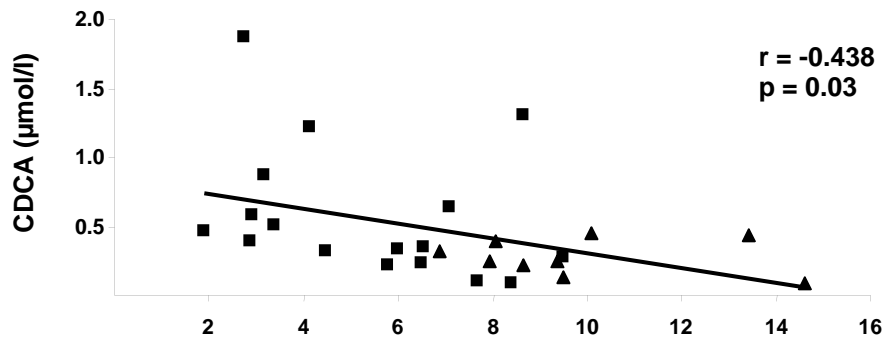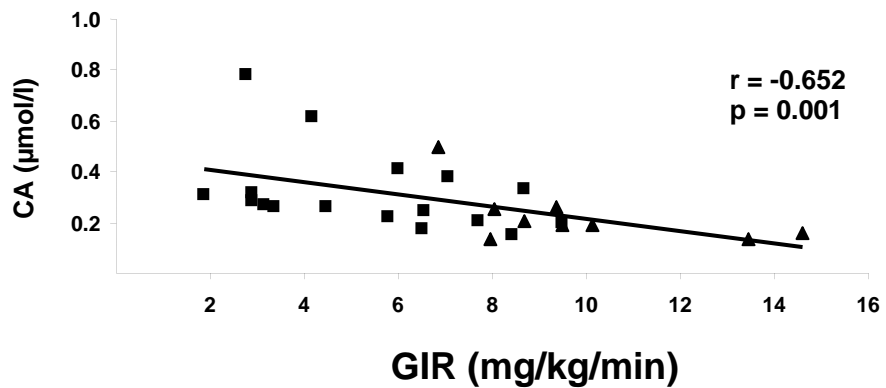**B**

Center 1

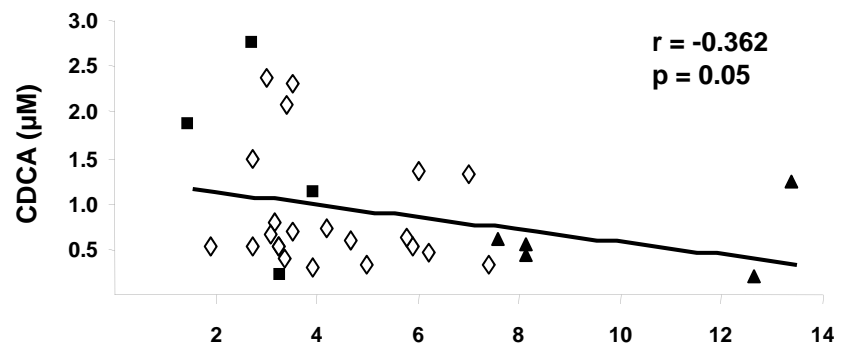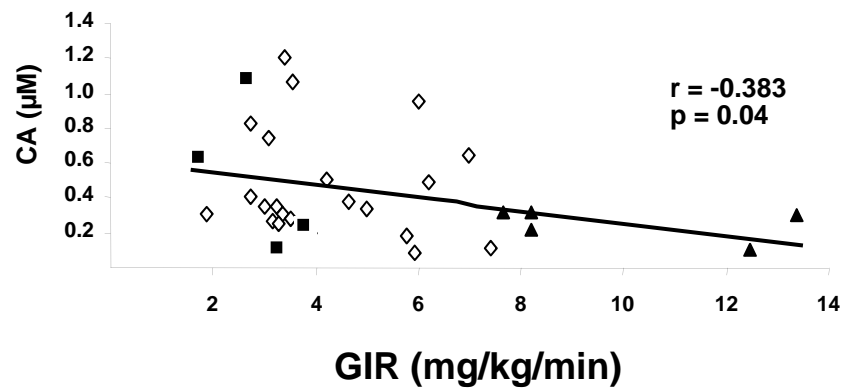

Supplement: 12986_2011_344_MOESM1_ESM.pdf [file 12986_2011_344_MOESM1_ESM.pdf]
